# Supplementary material
Source: MDPI journal article supplement (https://www.mdpi.com/2071-1050/15/3/1924)
Supplement: s1 [file s1]

**Table S1.** Results of quadratic regression for relationships with broiler overall acceptance (for all types of meat)

|                         | Breast meat   |       | Leg meat      |       |
|-------------------------|---------------|-------|---------------|-------|
|                         | $R^2 = 0.804$ |       | $R^2 = 0.644$ |       |
|                         | $b^1$         | $p^2$ | $b^1$         | $p^2$ |
| Tenderness <sup>2</sup> | 0.361         | 0.49  | -0.736        | 0.304 |
| Tenderness              | 0.123         | 0.816 | 1.237         | 0.12  |
| Juiciness <sup>2</sup>  | -0.328        | 0.453 | 0.551         | 0.588 |
| Juiciness               | 0.441         | 0.314 | -0.389        | 0.725 |
| Flavor <sup>2</sup>     | 0.05          | 0.91  | 0.497         | 0.515 |
| Flavor                  | 0.295         | 0.499 | -0.373        | 0.633 |
| Color <sup>2</sup>      | -1.099        | 0.169 | -0.053        | 0.933 |
| Color                   | 1.253         | 0.114 | 0.293         | 0.632 |

<sup>1</sup>Standardized partial coefficient of quadratic regression.<sup>2</sup>  $p$  – value based on quadratic regression analysis.
