# Supplementary material
Source: MDPI journal article supplement (https://www.mdpi.com/2071-1050/15/3/1924)
Supplement: s1 [file s1]

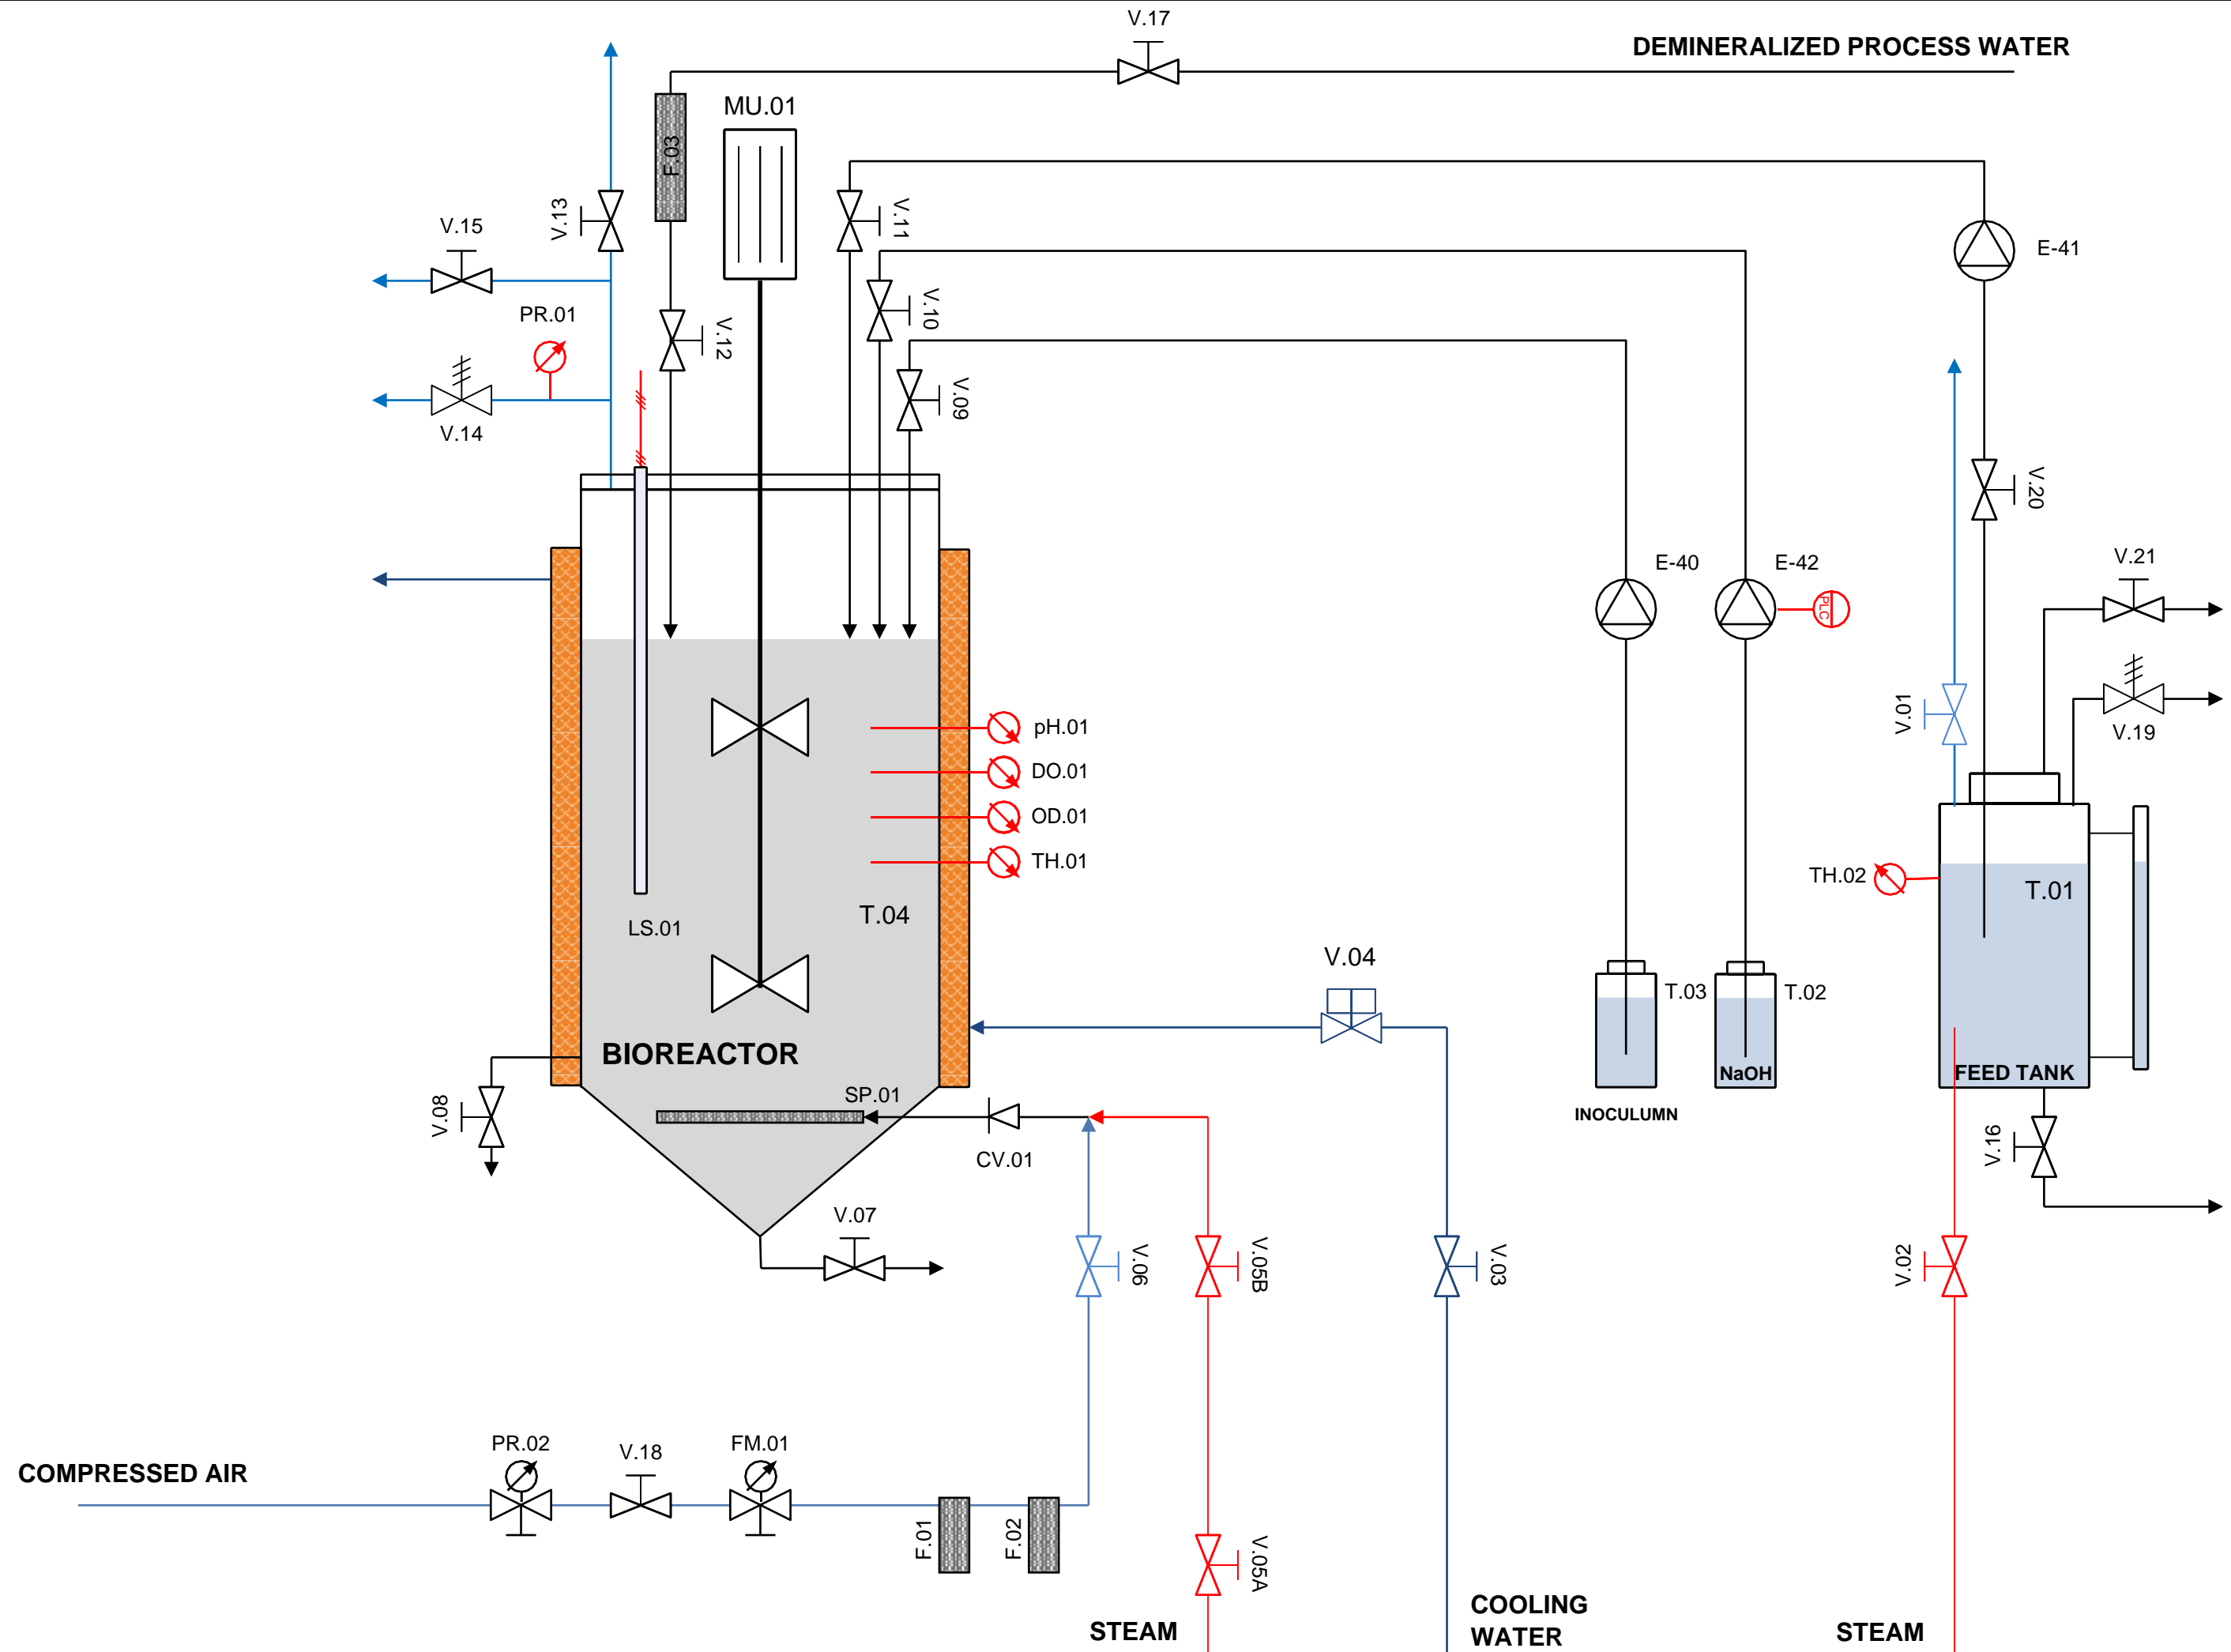

**Figure S1:** Schematic representation of the industrial-scale bioreactor pilot plant designed by NRRE Lab (CPERI/CERTH) used for the production of the yeast biomass.
